# Supplementary material
Source: ML conference proceedings conference paper supplement (https://openaccess.thecvf.com/content/CVPR2024/html/Pu_M3-UDA_A_New_CVPR_2024_paper.html)
Supplement: Supplementary file 1 [file Pu_M3-UDA_A_New_CVPR_2024_supplemental.pdf]

# Supplementary Material for $M^3$ -UDA: A New Benchmark for Unsupervised Domain Adaptive Fetal Cardiac Structure Detection

Bin Pu<sup>1\*</sup> Liwen Wang<sup>2\*</sup> Jiewen Yang<sup>1\*</sup> Guannan He<sup>3</sup> Xingbo Dong<sup>2</sup> Shengli Li<sup>4</sup>  
 Ying Tan<sup>4</sup> Ming Chen<sup>5</sup> Zhe Jin<sup>2</sup> Kenli Li<sup>6†</sup> Xiaomeng Li<sup>1†</sup>

<sup>1</sup> The Hong Kong University of Science and Technology.

<sup>2</sup> Anhui Provincial International Joint Research Center for Advanced Technology in Medical Imaging, Anhui University, China. <sup>3</sup> Sichuan Provincial Maternity and Child Health Care Hospital.

<sup>4</sup> Shenzhen Maternity and Child Healthcare Hospital. <sup>5</sup> Harbin Red Cross Central Hospital. <sup>6</sup> Hunan University.

{eebinpu, eexmli}@ust.hk, jyangu@connect.ust.hk, {jinzhe, xingbo.dong}@ahu.edu.cn, lkl@hnu.edu.cn

## Effects of backbone and detector on our approach

Table 1 shows the effect of different backbones as the feature extractor and various detection heads on the adaptation task.

## Algorithm Pipeline

Based on our description of the proposed  $M^3$ -UDA in Section 3 method, the following algorithm description is presented for the HM, SM, and GM components.

Table 1. Compare different detection heads and feature extractors on 4CC.

| Hospital 1→2   |                   |       |       |       |       |       |       |       |       |       |         |
|----------------|-------------------|-------|-------|-------|-------|-------|-------|-------|-------|-------|---------|
| Detection head | Feature extractor | RA    | RV    | LV    | VS    | SP    | LA    | CR    | DAO   | RIB   | mAP (%) |
| Faster-RCNN    | VGG-16            | 76.40 | 85.31 | 78.20 | 77.32 | 74.73 | 85.43 | 75.52 | 79.71 | 72.93 | 78.39   |
|                | ResNet-50         | 65.31 | 62.66 | 63.16 | 52.93 | 63.36 | 63.12 | 58.57 | 59.31 | 65.73 | 61.57   |
|                | ResNet-101        | 70.64 | 61.52 | 63.16 | 66.58 | 66.72 | 62.34 | 75.31 | 68.64 | 68.92 | 67.09   |
|                | ResNet-152        | 79.18 | 65.87 | 66.13 | 66.32 | 74.84 | 67.26 | 72.21 | 64.42 | 67.48 | 69.31   |
| FCOS           | VGG-16            | 58.56 | 46.50 | 52.43 | 48.99 | 56.56 | 42.98 | 49.52 | 54.23 | 35.76 | 49.52   |
|                | ResNet-50         | 81.09 | 65.29 | 70.54 | 67.12 | 77.56 | 69.33 | 79.28 | 77.86 | 77.06 | 73.90   |
|                | ResNet-101        | 79.94 | 69.77 | 72.84 | 71.73 | 81.02 | 77.99 | 81.70 | 77.99 | 78.28 | 76.81   |
|                | ResNet-152        | 83.79 | 77.28 | 80.98 | 76.68 | 83.30 | 80.07 | 84.34 | 79.96 | 82.24 | 80.96   |

## Algorithm 1 Histogram Matching (HM)

**Output:**  $X^{t'}$ : The  $X^t$  after the Histogram Matching with  $X^s$ .

**Input:**  $X^{s,t}$ : Input images from source and target domain.

- 1:  $P^{s/t} = \{p_i^{s/t}\}_{i=0}^k \leftarrow$ : Get the normalized histogram of  $X^s$  and  $X^t$ ;
- 2:  $\sigma := \arg \min \sum_{i=1}^k d(M(P^s), P^t) \leftarrow$ : Conduct the optimal mapping  $\sigma(\cdot)$ ;
- 3:  $X^{t'} = \sigma(X^t) \leftarrow$ : conduct the histogram matching via optimal mapping  $\sigma(\cdot)$ ;
- 4: **return**  $X^{t'}$ ;

Equation (1) in paper

\*Equal Contribution.

†Corresponding author.

---

**Algorithm 2** Sub-structure Matching (SM)

---

**Output:**  $\mathcal{L}_{SM}$  : The graph matching loss of SM;

$\mathcal{L}_{sup}$  : The loss of detection result.

**Input:**  $X^{s,t}$  : Input images from source and target domain;

$Y^s$  : The ground truth of the source domain;

$\mathcal{L}_{bce}(\cdot)$  : Binary cross-entropy Loss;

$\mathcal{L}_{iou}(\cdot)$  : Intersection over Union Loss;

Encoder( $\cdot$ ) : The parameter shared feature extractor;

Decoder( $\cdot$ ) : The parameter shared detection head for generating the detection result;

1:  $f^{s,t} \leftarrow \text{Encoder}(X^{s,t})$

2:  $\hat{Y}^{s,t} \leftarrow \text{Decoder}(f^{s,t})$

3:  $\mathcal{L}_{sup} \leftarrow \mathcal{L}_{bce}(\hat{Y}^s, Y^s) + \mathcal{L}_{iou}(\hat{Y}^s, Y^s)$

**(1). Sub-structure Relation Construction.**

4:  $\{c^{s,t}\} \leftarrow$  Get the location of different organs according to the corresponding position of each organ from  $Y^s$  and  $\hat{Y}^t$ .

5:  $A^{s/t} = \begin{pmatrix} \theta(c_0, c_0) & \cdots & \theta(c_0, c_j) \\ \vdots & \vdots & \vdots \\ \theta(c_i, c_0) & \cdots & \theta(c_i, c_j) \end{pmatrix}^{s/t} \leftarrow$  Generate adjacency matrix according to  $c^{s/t}$ . Equation (2) in paper

**(2). Sub-structure Matching.**

6:  $\mathcal{L}_{SM} = \sum_{i=0}^n \sum_{j=0}^n \|A_{i,j}^s - A_{i,j}^t\|_2$ . Equation (3) in paper

7: **return**  $\mathcal{L}_{SM}, \mathcal{L}_{sup}$

---

---

**Algorithm 3** Global-structure Matching (GM)

---

**Output:**  $\mathcal{L}_{GM}$  : The graph matching loss of GM;  $\mathcal{L}_{cls}$  : The classification loss on node;

**Input:**  $X^{s,t}$  : Input images from source and target domain;

$Y^s$  : The ground truth of the source domain;

Encoder( $\cdot$ ) : The parameter shared feature extractor;

Decoder( $\cdot$ ) : The parameter shared detection head for prediction of the detection result;

GNN( $\cdot$ ) : The graph convolutional neural network to transform the visual graph;

$W_q, W_k$  and  $W_v$  : The learnable weight of three independent projection layers that project the graph to different latent space as query, key and value vector;

1:  $f^{s,t} \leftarrow \text{Encoder}(X^{s,t})$

2:  $\hat{Y}^{s,t} \leftarrow \text{Decoder}(f^{s,t})$

**(1). Organ Feature Extraction and Visual Node Sampling.**

3: sample total  $M$  visual nodes from  $F^{s/t}$  as  $\mathcal{V}^{s/t} \in \mathbb{R}^{M \times d}$ , according to the corresponding position of each organ from the  $Y^s$  and  $\hat{Y}^t$ ,

4: compute the edge  $\mathcal{E}^{s/t} \in \mathbb{R}^{M \times M}$  that represents the connectivity between each node of organs in  $\mathcal{V}^{s/t}$  by using spectral clustering.

**(2). Global Graphical Representation Construction.**

5:  $\mathcal{G}^{s/t} = \text{GNN}(\{\mathcal{V}, \mathcal{E}\}^{s/t}) \in \mathbb{R}^{M \times d}$ . Equation (4) in paper

**(3). Organ Morphology Knowledge Transfer.**

6:  $\hat{\mathcal{G}}^{s/t} = \lambda \cdot (W_q \mathcal{G}^{s/t} (W_k \mathcal{G})^T) W_v (\mathcal{G}^s \oplus \mathcal{G}^t) \in \mathbb{R}^{M \times d}$  Equation (5) in paper

**(4). Graph Matching and Node Classification.**

7:  $\mathcal{L}_{GM} = \sum_{i=0}^d \sum_{j=0}^M \|\hat{\mathcal{G}}_{i,j}^s, \hat{\mathcal{G}}_{i,\pi(j)}^t\|_2^2$ . Equation (6) in paper

8:  $\mathcal{L}_{cls} = \text{CE}(\hat{\mathcal{G}}^s, Y^s) + \text{CE}(\hat{\mathcal{G}}^t, \hat{Y}^t)$  Equation (7) in paper

9: **return**  $\mathcal{L}_{GM}, \mathcal{L}_{cls}$

---
